# Supplementary material for: Geometries, molecular Rayleigh scattering, Raman and infrared frequencies of polycyclic aromatic hydrocarbons and subunits of graphite studied by DFT methods
Source: Royal Society of Chemistry journal article supplement (doi:10.1039/d1ea00105a), 2022-01-01
Supplement: d1ea00105a1.pdf [file d1ea00105a1.pdf]

## Supporting Information: Geometries, Molecular Rayleigh Scattering, Raman and Infrared Frequencies of Polycyclic Aromatic Hydrocarbons and Subunits of Graphite studied by DFT methods

*Freja Hasager<sup>1</sup>, Ole John Nielsen<sup>1</sup> and Kurt V. Mikkelsen<sup>1</sup>*

<sup>1</sup>Department of Chemistry, University of Copenhagen, Universitetsparken 5, 2100  
Copenhagen Ø, Denmark

### 1 Supporting information

#### 1.1 Geometry optimizations

Table 1: Bond lengths and bond angles of 2H-benzo(cd)pyrene.

| Method         | Basis set    | R(3,8) [Å] | R(3,4) [Å] | A(4,3,8) [degrees] |
|----------------|--------------|------------|------------|--------------------|
| B3LYP          | 6-31+G(d,p)  | 1.4268     | 1.4268     | 120.1326           |
|                | 6-311+G(d,p) | 1.4242     | 1.4242     | 120.1207           |
|                | aug-cc-pVDZ  | 1.4278     | 1.4278     | 120.1294           |
|                | aug-cc-pVTZ  | 1.4207     | 1.4207     | 120.1259           |
| $\omega$ B97XD | 6-31+G(d,p)  | 1.4242     | 1.4242     | 120.0778           |
|                | 6-311+G(d,p) | 1.4219     | 1.4219     | 120.0663           |
|                | aug-cc-pVDZ  | 1.4252     | 1.4252     | 120.0718           |
|                | aug-cc-pVTZ  | -          | -          | -                  |
| M06-2X         | 6-31+G(d,p)  | 1.425      | 1.425      | 120.0352           |
|                | 6-311+G(d,p) | 1.423      | 1.423      | 120.0209           |
|                | aug-cc-pVDZ  | 1.4253     | 1.4253     | 120.0223           |
|                | aug-cc-pVTZ  | 1.4196     | 1.4196     | 120.0358           |

Table 2: double-layer subunit bond lengths and angles.

| Top layer      |              |                           |                           |                       |
|----------------|--------------|---------------------------|---------------------------|-----------------------|
|                | Basis set    | R(3,8) [ $\text{\AA}$ ]   | R(3,4) [ $\text{\AA}$ ]   | A(4,3,8) [degrees]    |
| B3LYP          | 6-31+G(d,p)  | 1.4259                    | 1.4267                    | 120.0404              |
|                | 6-311+G(d,p) | 1.4232                    | 1.4241                    | 120.0269              |
| $\omega$ B97XD | 6-31+G(d,p)  | 1.4207                    | 1.4235                    | 119.8446              |
|                | 6-311+G(d,p) | 1.4183                    | 1.4213                    | 119.8296              |
| M06-2X         | 6-31+G(d,p)  | 1.4217                    | 1.4242                    | 119.8256              |
|                | 6-311+G(d,p) | 1.4197                    | 1.4223                    | 119.8089              |
| Bottom layer   |              |                           |                           |                       |
|                | Basis set    | R(33,38) [ $\text{\AA}$ ] | R(33,34) [ $\text{\AA}$ ] | A(34,33,38) [degrees] |
| B3LYP          | 6-31+G(d,p)  | 1.4267                    | 1.4259                    | 120.0411              |
|                | 6-311+G(d,p) | 1.4241                    | 1.4232                    | 120.0269              |
| $\omega$ B97XD | 6-31+G(d,p)  | 1.4235                    | 1.4207                    | 119.8449              |
|                | 6-311+G(d,p) | 1.4213                    | 1.4183                    | 119.8298              |
| M06-2X         | 6-31+G(d,p)  | 1.4242                    | 1.4217                    | 119.8262              |
|                | 6-311+G(d,p) | 1.4223                    | 1.4197                    | 119.8095              |

## 1.2 Raman spectra

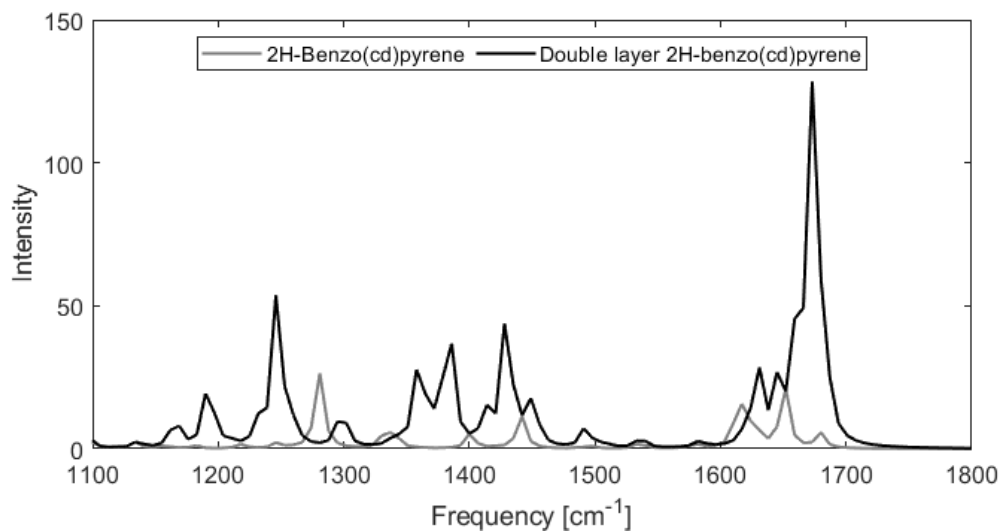

Figure 1: Zoom of Raman spectra obtained from M06-2X/6-311+G(d,p) calculations of a 2H-benzo(cd)pyrene (gray) and the double-layer subunit (black).

Single layer:

| Center<br>Number | Atomic<br>Number | Atomic<br>Type | Coordinates (Angstroms) |           |           |
|------------------|------------------|----------------|-------------------------|-----------|-----------|
|                  |                  |                | X                       | Y         | Z         |
| 1                | 6                | 0              | 1.244592                | 2.706640  | -0.000007 |
| 2                | 6                | 0              | -0.000002               | 2.017341  | -0.000007 |
| 3                | 6                | 0              | -0.000001               | 0.602626  | -0.000003 |
| 4                | 6                | 0              | 1.232160                | -0.108343 | -0.000005 |
| 5                | 6                | 0              | 2.458281                | 0.599868  | -0.000008 |
| 6                | 6                | 0              | 2.426804                | 2.027988  | -0.000007 |
| 7                | 1                | 0              | 1.237145                | 3.791263  | -0.000005 |
| 8                | 6                | 0              | -1.232158               | -0.108342 | 0.000004  |
| 9                | 6                | 0              | 1.230297                | -1.538553 | -0.000003 |
| 10               | 1                | 0              | 3.367887                | 2.566844  | -0.000006 |
| 11               | 6                | 0              | -0.000001               | -2.223611 | 0.000002  |
| 12               | 6                | 0              | -1.230299               | -1.538558 | 0.000007  |
| 13               | 1                | 0              | 0.000004                | -3.308637 | 0.000002  |
| 14               | 6                | 0              | 3.668568                | -0.122003 | -0.000010 |
| 15               | 1                | 0              | 4.606253                | 0.422103  | -0.000011 |
| 16               | 6                | 0              | 3.663814                | -1.510726 | -0.000011 |
| 17               | 1                | 0              | 4.603471                | -2.049994 | -0.000013 |
| 18               | 6                | 0              | 2.468365                | -2.215723 | -0.000008 |
| 19               | 1                | 0              | 2.472979                | -3.299879 | -0.000009 |
| 20               | 6                | 0              | -2.468366               | -2.215721 | 0.000016  |
| 21               | 1                | 0              | -2.472991               | -3.299876 | 0.000018  |
| 22               | 6                | 0              | -3.663819               | -1.510718 | 0.000021  |
| 23               | 1                | 0              | -4.603472               | -2.049994 | 0.000029  |
| 24               | 6                | 0              | -3.668572               | -0.122003 | 0.000017  |
| 25               | 1                | 0              | -4.606251               | 0.422114  | 0.000018  |
| 26               | 6                | 0              | -2.458276               | 0.599872  | 0.000008  |
| 27               | 6                | 0              | -2.426803               | 2.027983  | -0.000003 |
| 28               | 6                | 0              | -1.244585               | 2.706640  | -0.000004 |
| 29               | 1                | 0              | -3.367882               | 2.566845  | -0.000003 |
| 30               | 1                | 0              | -1.237144               | 3.791263  | -0.000011 |

Double layer:

| Center<br>Number | Atomic<br>Number | Atomic<br>Type | Coordinates (Angstroms) |          |          |
|------------------|------------------|----------------|-------------------------|----------|----------|
|                  |                  |                | X                       | Y        | Z        |
| 1                | 6                | 0              | 0.406079                | 2.971957 | 1.669141 |
| 2                | 6                | 0              | -0.482553               | 1.863904 | 1.750102 |
| 3                | 6                | 0              | 0.052221                | 0.554119 | 1.660585 |
| 4                | 6                | 0              | 1.453090                | 0.360097 | 1.509613 |
| 5                | 6                | 0              | 2.313586                | 1.479454 | 1.424210 |
| 6                | 6                | 0              | 1.746200                | 2.789408 | 1.499583 |
| 7                | 1                | 0              | -0.008574               | 3.973100 | 1.725588 |

|    |   |   |           |           |           |
|----|---|---|-----------|-----------|-----------|
| 8  | 6 | 0 | -0.817995 | -0.567452 | 1.675740  |
| 9  | 6 | 0 | 1.988268  | -0.965919 | 1.428335  |
| 10 | 1 | 0 | 2.411175  | 3.643736  | 1.425523  |
| 11 | 6 | 0 | 1.108868  | -2.066663 | 1.462430  |
| 12 | 6 | 0 | -0.278203 | -1.889205 | 1.556602  |
| 13 | 1 | 0 | 1.516052  | -3.071228 | 1.425902  |
| 14 | 6 | 0 | 3.694575  | 1.271369  | 1.242237  |
| 15 | 1 | 0 | 4.350725  | 2.131994  | 1.167604  |
| 16 | 6 | 0 | 4.215138  | -0.013277 | 1.180977  |
| 17 | 1 | 0 | 5.282528  | -0.154774 | 1.054149  |
| 18 | 6 | 0 | 3.381123  | -1.122311 | 1.265201  |
| 19 | 1 | 0 | 3.793405  | -2.123956 | 1.218254  |
| 20 | 6 | 0 | -1.184232 | -2.970999 | 1.459394  |
| 21 | 1 | 0 | -0.786138 | -3.973076 | 1.334640  |
| 22 | 6 | 0 | -2.553029 | -2.771707 | 1.563370  |
| 23 | 1 | 0 | -3.224851 | -3.620541 | 1.503630  |
| 24 | 6 | 0 | -3.072543 | -1.492706 | 1.717789  |
| 25 | 1 | 0 | -4.143207 | -1.341441 | 1.799326  |
| 26 | 6 | 0 | -2.217928 | -0.372860 | 1.781450  |
| 27 | 6 | 0 | -2.724820 | 0.955142  | 1.914525  |
| 28 | 6 | 0 | -1.883721 | 2.030338  | 1.902321  |
| 29 | 1 | 0 | -3.795918 | 1.092698  | 2.013103  |
| 30 | 1 | 0 | -2.279431 | 3.037549  | 1.983438  |
| 31 | 6 | 0 | 1.883588  | 2.033280  | -1.900022 |
